# Supplementary material
Source: publisher figshare collection journal article supplement (https://gsajournals.figshare.com/articles/dataset/_/12276461)
Supplement: Supplementary file 1 [file 2]

## Sheet: Table of Contents
S1 Dataset. Flow cytometry, mutation rates, and modeling of diploid evolution.
Page	Description
1	Ploidy measurements of eex mapping strains described in S1B Fig.
2	Ploidy measurements of pol2-4 msh6Δ evolved cultures described in Fig 1B.
3	Ploidy measurements of pol2-4 msh6Δ T8 subclones described in Fig 1C.
4	Ploidy measurements of pol2-4 msh6Δ subclones described in S2A Fig.
5	Mutation rate measurements of pol2-4 msh6Δ subclones described in S2B Fig.
6	Ploidy measurements of strains isolated by same sex mating between T1 pol2-4 msh6Δ cultures described in S3 Fig.
7	Ploidy measurements of competition experiment between pol2-4 msh6Δ derived diploid and tetraploid strains described in Fig 2B.
8	Simulation of evolution of pol3-01/pol3-01 msh6Δ/msh6Δ evolved cultures described in S4 Fig.
9	Ploidy measurements of pol3-01/pol3-01 msh6Δ/msh6Δ evolved cultures described in Fig 3B.
10	Ploidy measurments of T25 pol3-01/pol3-01 msh6Δ/msh6Δ subclones analyzed in Fig 4.
11	Mutation rate measurements of pol3-01/pol3-01 msh6Δ/msh6Δ subclones described in Fig 4.
12	Ploidy measurements of pol2-P301R/POL2 msh2Δ/msh2Δ evolved cultures described in Fig.5C.
13	Mutation rate measurements of T10 pol2-P301R/POL2 msh2Δ/msh2Δ subclones described in Fig. 5D and pol2 changes in Fig.5E.
14	POLE-P286R cancers on cBioPortal depicted in Fig. 5G.

## Sheet: 1
All histograms plotted with 1n, 2n, 3n and 4n controls (see A1).
	1	2	3	4	5	6	7	8	9	10	11	12
A	1n,2n,3n(poor), 4n Controls	AH13205: 2n	AH13215: 2n	AH13223: 3n	AH13231: 3n	AH13239: 3n
B		AH13206: 3n	AH13216: 4n	AH13224: 3n	AH13232: 3n	AH13240: 2n
C		AH13208: 2n	AH13217: 2n	AH13225: 3n	AH13233: 2n	AH13241: 3n
D		AH13209: 3n	AH13218: 3n	AH13226: 3n	AH13234: 3n	AH13242: 2n
E		AH13210: 3n	AH13219: 4n	AH13227: 3n	AH13235: 3n	AH13243: 3n	AH13252: 2n
F	AH13202: 3n	AH13212: 2n	AH13220: 3n	AH13228: 3n	AH13236: 3n	AH13244: 2n	AH13253: 3n
G	AH13203: 3n	AH13213: 3n	AH13221: 3n	AH13229: 3n	AH13237: 3n	AH13246: 3n	AH13254: 4n
H	AH13204: 2n	AH13214: 3n	AH13222: 4n	AH13230: 2n	AH13238: 4n	AH13247: 2n	AH13255: 2n
All histograms plotted with 1n, 2n, and 4n controls (see E6).
	1	2	3	4	5	6	7	8	9	10	11	12
A	AH13256: 2n	AH4683: 3n	AH4691: 3n	AH46107: 4n	AH4699: 3n	AH13248: 4n	AH13238: 4n
B	AH13257: 2n	AH4684: 3n	AH4692: 3n	AH13216: 3n & 4n	AH46100: 3n	AH13249: 2n	AH13254: 4n
C	AH13258: 3n	AH4685: 2n	AH4693: 3n	AH46109: 3n	AH46101: 3n	AH13250: 2n
D	AH13259: 2n	AH4686: 3n	AH4694: 3n	AH46110: 2n	AH46102: 3n	AH4651: 2n
E	AH13260: 2n	AH4687: 3n	AH4695: 3n	AH46111: 3n	AH46103: 3n	1n,2n,4n controls
F	AH13261: 3n	AH4688: 3n	AH4696: 3n	AH46112: 4n	AH46104: 3n
G	AH13262: 2n	AH4689: 2n	AH4697: 2n	AH13219: 3n	AH46105: 3n
H	AH13201: 5n	AH4690:3n	AH4698: 3n & 4n	AH13222: 4n	AH46106: 3n
All histograms plotted with A1 (3n) and B1(2n) serving as controls.
	1	2	3	4	5	6	7	8	9	10	11	12
A	AH4601: 3n, used as 3n control	AH4602: 3n	AH4603: 5n	AH4604: 3n	AH4605: 3n	AH4606: 3n	AH4607: 3n	AH4608: 3n	AH4609: 3n	AH4610: 2n	AH4611: 3n	AH4612: 3n
B	AH4613: 2n, used as 2n control	AH4614: 2n	AH4615: 3n	AH4616: 3n	AH4617: 3n	AH4618: 3n	AH4619: 3n	AH4620: 3n	AH4621: 3n	AH4622: 3n	AH4623: 2n	AH4624: 2n
C	AH4625: 3n	AH4626: 3n	AH4627: 3n	AH4628: 3n	AH4629: 3n	AH4630: 1n & 3n	AH4631: 3n	AH4632: 3n	AH4633: 1n & 3n	AH4634: 4n	AH4635: 3n	AH4636: 2n
D	AH4637: 3n	AH4638: 2n	AH4639: 3n	AH4640: 3n	AH4641: 3n	AH4642: 4n	AH4643: 1n & 3n	AH4644: 1n & 3n	AH4645: 3n	AH4646: 2n	AH4647: 2n	AH4648: 3n
E	AH4649: 2n	AH4650: 1n & 3n	AH4651: 2n	AH4652: 3n	AH4653: 3n	AH4654: 1n & 3n	AH4655: 3n	AH4656: 3n	AH4657: 1n & 3n	AH4658: 2n	AH4659: 3n	AH4660: 3n
F	AH4661: 3n & 4n	AH4662: 3n	AH4663: 3n	AH4664: 1n & 3n	AH4665: 2n	AH4666: 3n	AH4667: 3n	AH4668: 2n	AH4669: 1n & 3n	AH4670: 3n	AH4671: 3n
G	AH4673: 3n	AH4674: 3n	AH4675: 3n	AH4676: 3n	AH4677: 2n & 3n	AH4678: 2n	AH4679: 3n	AH4680: 1n & 3n	AH4681: 2n	AH4682: 1n & 3n
H

## Sheet: 2
Ploidy measurements of AH12721 evolved cultures for Fig.1B
T1	1	2	3	4	5	6	7	8	9	10	11	12
A	1n & 2n	1n	1n	1n & 3n	1n	1n	1n	1n	1n	1n & 2n	1n	1n
B	1n	1n & 2n	1n	1n	1n	1n	1n	1n	empty	1n & 2n	empty	1n
C	1n	1n & 2n	1n	1n	1n	1n & 2n	1n	1n	1n	1n	1n	1n & 2n
D	1n & 2n	1n	empty	1n	empty	1n & 2n	1n	1n	1n	1n	1n	1n
E	1n	1n	1n & 2n	1n	1n & 2n	1n	1n	1n	1n	1n	1n	1n
F	empty	1n	1n	1n	1n	1n & 2n	1n	1n	1n	1n	1n	1n
G	1n	1n	1n & 2n	1n	1n & 2n	1n	1n	1n & 2n	1n & 2n	1n	1n	1n
H	1n	1n	1n	1n	1n	empty	1n	1n	1n	1n	1n	empty
(All histograms plotted with A8 (1n) and G9 (2n) as controls).
T4	1	2	3	4	5	6	7	8	9	10	11	12
A	2n	1n & 2n	1n & 2n	3n	1n & 2n	1n & 2n	1n & 2n	1n (used as internal standard)	1n & 2n	2n & 3n	1n & 2n	1n & 2n
B	1n & 2n	2n	1n & 2n	1n & 2n	1n & 2n	1n & 2n	1n & 2n	1n & 2n	empty	1n & 2n	empty	1n & 2n
C	1n & 2n	2n	1n & 2n	1n & 2n	1n & 2n	2n	1n & 2n	1n & 2n	1n & 2n	1n & 2n	1n & 2n	1n & 2n
D	1n & 2n	1n & 2n	empty	1n & 2n	empty	2n	1n & 2n	1n & 2n	1n & 2n	1n & 2n	?	1n & 2n
E	1n & 2n	1n & 2n	2n	?	2n	1n & 2n	1n & 2n	1n & 2n	1n & 2n	1n & 2n	1n & 2n	1n & 2n
F	empty	1n & 2n	1n & 2n	2n	1n & 2n	2n	1n & 2n	1n & 2n	1n & 2n	1n & 2n	1n & 2n	1n & 2n
G	1n & 2n	1n & 2n	2n	1n & 2n	1n & 2n	1n & 2n	1n & 2n	1n & 2n	2n (used as internal standard)	1n & 2n	1n & 2n	1n & 2n
H	1n & 2n	1n & 2n	1n & 2n	1n & 2n	1n & 2n	empty	1n & 2n	1n & 2n	1n & 2n	1n & 2n	1n & 2n	empty
(All histograms plotted with A8 (1n) and D1 (2n) as controls).
T7	1	2	3	4	5	6	7	8	9	10	11	12
A	2n	2n	2n	3n	2n	2n	2n	1n	2n	2n & 3n	2n	2n
B	2n	2n	2n	2n	1n & 2n	1n & 2n	2n	1n & 2n	empty	2n	empty	2n
C	2n	2n	1n & 2n	2n	2n	2n	2n	2n	1n & 2n	2n	2n	2n
D	D1 used as a 2n standard	2n	empty	2n	empty	2n	1n & 2n	2n & 3n	2n	2n	?	2n
E	2n	2n	2n	?	2n	2n	2n	1n & 2n	2n	2n	2n	2n
F	empty	2n	2n	2n	2n	2n	2n	2n	2n	1n & 2n	1n & 2n	2n
G	2n	2n	2n	2n	2n	1n & 2n	2n	2n	2n	2n	2n	2n
H	2n	2n	2n	2n	2n	empty	2n	1n & 2n	2n	2n	2n	empty

## Sheet: 3
Ploidy measurements of AH12721 T8 subclones for Fig.1C. (All histgrams plotted with A8 as a 1n control).
	1	2	3	4	5	6	7	8	9	10	11	12
	1	2	3	4	5	6	7	8	9	10	11	12
A	2n, separate flow experiment	2n	2n	3n	2n	2n	2n	1n (used as 1n control)	2n	2n	2n	2n
B	2n	2n	2n	2n	1n & 2n	2n	2n	2n, aa by PCR, unable to mate	empty	2n	empty	2n
C	2n	2n	1n & 2n	2n	2n	2n	2n	2n	2n	2n	2n	2n
D	2n	2n	empty	2n	empty	2n	2n	2n	2n	2n	empty	2n
E	2n	2n	2n	censored well, 2n control	2n	2n	2n	2n	2n	2n	2n	2n
F	empty	2n	2n	2n	2n	2n	2n	2n	2n	2n	2n	2n
G	2n	2n	2n	2n	2n	2n	2n	2n	2n	2n	2n	2n, aa by PCR, unable to mate
H	2n	2n	2n	2n	2n	empty	2n	2n	2n	2n	2n	empty

## Sheet: 4
Ploidy of AH12721 subclone cultures for Fig.S2A. (All histograms plotted with B1.4(2n) and F2.2(1n) as controls).
T1	1	2	3	4	5	6	7	8	9	10	11	12
A	A1.3	G1.4	F2.1	B3.3	B4.3	E5.4	C6.4	G6.1	D7.3	B8.2	G8.4	D9.1
B	B1.1	A2.3	F2.2	E3.1	D4.4	G5.1	D6.1	G6.2	E7.3	B8.3	H8.1	H9.2
C	B1.2	B2.2	F2.4	E3.2	F4.2	G5.3	D6.4	G6.3	E7.4	C8.2	H8.2	A10.1
D	B1.4	B2.3	H2.2	G3.1	F4.3	H5.4	E6.2	B7.1	F7.3	C8.3	H8.4	C10.3
E	C1.2	B2.4	H2.4	G3.3	G4.2	A6.1	F6.1	B7.2	G7.3	D8.3	A9.1	C10.4
F	C1.3	D2.1	A3.1	H3.1	H4.2	B6.3	F6.2	C7.2	H7.4	F8.2	A9.4	D10.1
G	D1.3	E2.1	A3.2	A4.1	H4.3	C6.2	F6.3	C7.3	A8.2	F8.4	C9.1	D10.3
H	E1.4	E2.2	B3.1	B4.1	B5.4	C6.3	F6.4	C7.4	A8.3	G8.3	C9.3	D10.4
(All histograms plotted with D12.1, a mixed 1n and 2n culture, as a control).
T4	1	2	3	4	5	6	7	8	9	10	11	12
A	F10.2	E11.4	D12.1
B	G10.1	F11.1	D12.3
C	H10.1	F11.3	D12.2
D	A11.3	G11.4	E12.3
E	A11.4	A12.3	E12.4
F	C11.3	A12.4	F12.3
G	D11.1	B12.1	F12.4
H	D11.2	B12.2	G12.1

## Sheet: 5
					Mutation rates depicted in Fig. S2B
			Date		CultureID.isolate#	MR	low CI	high CI
			11.2.18		D1.3	0.000143	9.21833e-05	0.000198288
			11.2.18		G1.4	9.62149e-05	6.98476e-05	0.000123297
			11.2.18		B2.3	0.000167065	0.000118097	0.000216938
			11.2.18		B2.4	0.000171864	0.000107634	0.000244455
			12.18.18		F2.1	0.000128929	9.55295e-05	0.000160496
			12.18.18		F2.2	0.000109393	6.53537e-05	0.00015386
			12.18.18		G4.2	1.64821e-05	9.23868e-06	2.51952e-05
			11.2.18		G6.3	9.30923e-05	4.26426e-05	0.000160818
			11.2.18		C7.2	0.000123065	8.7318e-05	0.000158434
			11.2.18		F7.3	5.72053e-06	2.58499e-06	1.02877e-05
			11.2.18		G7.3	5.56171e-06	2.792e-06	9.57565e-06
			11.2.18		H7.4	1.45654e-05	9.01242e-06	2.12118e-05
			11.2.18		A8.2	1.24919e-05	7.96338e-06	1.77656e-05
			11.2.18		C8.2	1.5322e-05	8.94315e-06	2.3498e-05
			11.2.18		D8.3	0.000124771	8.71473e-05	0.000164388
			11.2.18		H8.1	0.000146804	0.000100961	0.000195196
			11.2.18		A9.1	9.38079e-06	5.10349e-06	1.50147e-05
			11.2.18		C9.1	7.24841e-05	4.36175e-05	0.00010616
			11.2.18		C9.3	5.53035e-06	2.28732e-06	1.08368e-05
			11.2.18		D10.3	0.000133258	9.38404e-05	0.000174424
			11.2.18		G10.1	9.6513e-06	4.5444e-06	1.72998e-05
			11.2.18		D11.1	0.000274035	0.000169202	0.000393303
			11.2.18		G11.4	4.73493e-05	3.00602e-05	6.65529e-05
			11.2.18		E12.3	3.80544e-05	1.75474e-05	6.50082e-05
			11.2.18		G12.1	1.54553e-05	7.19648e-06	2.7736e-05

## Sheet: 6
Ploidy of colonies arising from same-sex mating for Fig. S3B. (All histograms plotted with F6 as a control).
	1	2	3	4	5	6	7	8	9	10	11	12
A	2n	2n	2n	2n	2n	2n	2n	2n	2n	2n
B	2n	2n	2n	2n	2n	2n	2n	2n	3n	2n
C	2n	2n	2n	2n	2n	2n	2n	3n	2n	2n
D	2n	2n	2n	2n	2n	2n	2n	2n	2n	2n
E	1n	2n	empty	2n	2n	2n	4n	2n	2n	2n
F	2n	2n	2n control	2n	2n	2n	2n	3n	2n	2n
G	1n	1n	empty	2n	2n	2n	2n	3n	2n	2n
H	2n	empty	2n	2n	2n	2n	2n	2n & 3n	2n	2n

## Sheet: 7
Ploidy measurements of Block A T1
	1	2	3	4	5	6	7	8	9	10	11	12
A
B
C
D
E
F
G
H
Ploidy measurements of Block B T1
	1	2	3	4	5	6	7	8	9	10	11	12
A
B
C
D
E
F
G
H
Ploidy measurements of Block A T8
	1	2	3	4	5	6	7	8	9	10	11	12
A
B
C
D
E
F
G
H
Ploidy measurements of Block B T8
	1	2	3	4	5	6	7	8	9	10	11	12
A
B
C
D
E
F
G
H

## Sheet: 8
Simulation of how long would it take for an antimutator strain with a 10-fold reduction in mutation rate to overtake the culture.
	MR = MRcan1 = the rate of canavanine resistant mutants/cell division.
	Rcd = rate of cell death = (0.73 MRcan1)(0.73 MRcan1) (1000)(Ng)					for a tetraploid, Rcd = (0.73 MRcan1)^4(1000)(Ng)
	0.73 = Correction factor for median size of essential genes
	Ng = number of generations; 1000 = number of essential genes in yeast
	Probability (Pv) = e^(-Rcd ) Note: this is the equation for the Poisson distribution which is used to calculate the probabilty of rare events.
	How rapidly would an eex with a 10-fold reduction in MR take over a culture assuming transfer of 100,000 cells
	eex			Probability (Pv) of 0 homozygous lethal mutations	Dividing cells	Mutator		Cell divisions	Probability (Pv) of 0 homozygous lethal mutations	Dividing cells
			Cell divisions		0.0001					0.001
	Mutation rate (MR)	Rcd	0			Mutation rate (MR)	Rcd	0		1
	0.0001	5.329e-06	1	0.999995		0.001	0.0005329	1	0.999467	2
	0.0001	1.0658e-05	2	0.999989		0.001	0.0010658	2	0.998935	4
	0.0001	1.5987e-05	3	0.999984		0.001	0.0015987	3	0.998403	8
	0.0001	2.1316e-05	4	0.999979		0.001	0.0021316	4	0.997871	16
	0.0001	2.6645e-05	5	0.999973		0.001	0.0026645	5	0.997339	32
	0.0001	3.1974e-05	6	0.999968		0.001	0.0031974	6	0.996808	64
	0.0001	3.7303e-05	7	0.999963		0.001	0.0037303	7	0.996277	128
	0.0001	4.2632e-05	8	0.999957		0.001	0.0042632	8	0.995746	255
	0.0001	4.7961e-05	9	0.999952		0.001	0.0047961	9	0.995215	508
	0.0001	5.329e-05	10	0.999947		0.001	0.005329	10	0.994685	1011
	0.0001	5.8619e-05	11	0.999941		0.001	0.0058619	11	0.994155	2011
	0.0001	6.3948e-05	12	0.999936		0.001	0.0063948	12	0.993626	3998
	0.0001	6.9277e-05	13	0.999931		0.001	0.0069277	13	0.993096	7945
	0.0001	7.4606e-05	14	0.999925		0.001	0.0074606	14	0.992567	15780
	0.0001	7.9935e-05	15	0.99992		0.001	0.0079935	15	0.992038	31325
	0.0001	8.5264e-05	16	0.999915		0.001	0.0085264	16	0.99151	62151
	0.0001	9.0593e-05	17	0.999909		0.001	0.0090593	17	0.990982	123247
	0.0001	9.5922e-05	18	0.999904		0.001	0.0095922	18	0.990454	244271
	0.0001	0.000101251	19	0.999899		0.001	0.0101251	19	0.989926	483878
	0.0001	0.00010658	20	0.999893		0.001	0.010658	20	0.989399	958007
	0.0001	0.000111909	21	0.999888		0.001	0.0111909	21	0.988871	1895702
	0.0001	0.000117238	22	0.999883		0.001	0.0117238	22	0.988345	3749211
	0.0001	0.000122567	23	0.999877		0.001	0.0122567	23	0.987818	7411025
	0.0001	0.000127896	24	0.999872		0.001	0.0127896	24	0.987292	14641489
	0.0001	0.000133225	25	0.999867		0.001	0.0133225	25	0.986766	28910845
	0.0001	0.000138554	26	0.999861		0.001	0.0138554	26	0.98624	57056470
	0.0001	0.000143883	27	0.999856		0.001	0.0143883	27	0.985715	112542763
eex occurs	0.0001	0.000149212	28	0.999851	1	0.001	0.0149212	28	0.98519	221870118		Cullture Diluted
	0.0001	0.000154541	29	0.999845	2	0.001	0.0154541	29	0.984665	100000
	0.0001	0.00015987	30	0.99984	4	0.001	0.015987	30	0.98414	196933
	0.0001	0.000165199	31	0.999835	8	0.001	0.0165199	31	0.983616	387619
	0.0001	0.000170528	32	0.999829	16	0.001	0.0170528	32	0.983092	762536
	0.0001	0.000175857	33	0.999824	32	0.001	0.0175857	33	0.982568	1499286
	0.0001	0.000181186	34	0.999819	64	0.001	0.0181186	34	0.982045	2946301
	0.0001	0.000186515	35	0.999814	128	0.001	0.0186515	35	0.981521	5786798
	0.0001	0.000191844	36	0.999808	256	0.001	0.0191844	36	0.980998	11359732
	0.0001	0.000197173	37	0.999803	512	0.001	0.0197173	37	0.980476	22287759
	0.0001	0.000202502	38	0.999798	1024	0.001	0.0202502	38	0.979953	43705218
	0.0001	0.000207831	39	0.999792	2048	0.001	0.0207831	39	0.979431	85658160
	0.0001	0.00021316	40	0.999787	4095	0.001	0.021316	40	0.97891	167792582		Cullture Diluted
	0.0001	0.000218489	41	0.999782	2.44045	0.001	0.0218489	41	0.978388	99997.6
	0.0001	0.000223818	42	0.999776	5	0.001	0.0223818	42	0.977867	195673
	0.0001	0.000229147	43	0.999771	10	0.001	0.0229147	43	0.977346	382684
	0.0001	0.000234476	44	0.999766	20	0.001	0.0234476	44	0.976825	748029
	0.0001	0.000239805	45	0.99976	40	0.001	0.0239805	45	0.976305	1461387
	0.0001	0.000245134	46	0.999755	80	0.001	0.0245134	46	0.975785	2853518
	0.0001	0.000250463	47	0.99975	160	0.001	0.0250463	47	0.975265	5568838
	0.0001	0.000255792	48	0.999744	320	0.001	0.0255792	48	0.974745	10862183
	0.0001	0.000261121	49	0.999739	640	0.001	0.0261121	49	0.974226	21175721
	0.0001	0.00026645	50	0.999734	1280	0.001	0.026645	50	0.973707	41259871
	0.0001	0.000271779	51	0.999728	2559	0.001	0.0271779	51	0.973188	80350039
	0.0001	0.000277108	52	0.999723	5117	0.001	0.0277108	52	0.97267	156391406		Cullture Diluted
	0.0001	0.000282437	53	0.999718	3.27181	0.001	0.0282437	53	0.972151	99996.7
	0.0001	0.000287766	54	0.999712	7	0.001	0.0287766	54	0.971634	194424
	0.0001	0.000293095	55	0.999707	14	0.001	0.0293095	55	0.971116	377818
	0.0001	0.000298424	56	0.999702	28	0.001	0.0298424	56	0.970599	733810
	0.0001	0.000303753	57	0.999696	56	0.001	0.0303753	57	0.970081	1424470
	0.0001	0.000309082	58	0.999691	112	0.001	0.0309082	58	0.969565	2763704
	0.0001	0.000314411	59	0.999686	224	0.001	0.0314411	59	0.969048	5359179
	0.0001	0.00031974	60	0.99968	448	0.001	0.031974	60	0.968532	10386604
	0.0001	0.000325069	61	0.999675	896	0.001	0.0325069	61	0.968016	20119512
	0.0001	0.000330398	62	0.99967	1791	0.001	0.0330398	62	0.9675	38952011
	0.0001	0.000335727	63	0.999664	3581	0.001	0.0335727	63	0.966985	75372147
	0.0001	0.000341056	64	0.999659	7160	0.001	0.0341056	64	0.966469	145767415		Cullture Diluted
	0.0001	0.000346385	65	0.999654	4.91169	0.001	0.0346385	65	0.965955	99995.1
	0.0001	0.000351714	66	0.999648	10	0.001	0.0351714	66	0.96544	193181
	0.0001	0.000357043	67	0.999643	20	0.001	0.0357043	67	0.964926	373009
	0.0001	0.000362372	68	0.999638	40	0.001	0.0362372	68	0.964412	719852
	0.0001	0.000367701	69	0.999632	80	0.001	0.0367701	69	0.963898	1388467
	0.0001	0.00037303	70	0.999627	160	0.001	0.037303	70	0.963384	2676680
	0.0001	0.000378359	71	0.999622	320	0.001	0.0378359	71	0.962871	5157342
	0.0001	0.000383688	72	0.999616	640	0.001	0.0383688	72	0.962358	9931710
	0.0001	0.000389017	73	0.999611	1280	0.001	0.0389017	73	0.961845	19115721
	0.0001	0.000394346	74	0.999606	2559	0.001	0.0394346	74	0.961333	36772732
	0.0001	0.000399675	75	0.9996	5116	0.001	0.0399675	75	0.960821	70701670
	0.0001	0.000405004	76	0.999595	10228	0.001	0.0405004	76	0.960309	135863255		Cullture Diluted
	0.0001	0.000410333	77	0.99959	7.52759	0.001	0.0410333	77	0.959797	99992.5
	0.0001	0.000415662	78	0.999584	15	0.001	0.0415662	78	0.959286	191843
	0.0001	0.000420991	79	0.999579	30	0.001	0.0420991	79	0.958775	367868
	0.0001	0.00042632	80	0.999574	60	0.001	0.042632	80	0.958264	705029
	0.0001	0.000431649	81	0.999568	120	0.001	0.0431649	81	0.957753	1350488
	0.0001	0.000436978	82	0.999563	240	0.001	0.0436978	82	0.957243	2585491
	0.0001	0.000442307	83	0.999558	480	0.001	0.0442307	83	0.956733	4947250
	0.0001	0.000447636	84	0.999552	960	0.001	0.0447636	84	0.956224	9461354
	0.0001	0.000452965	85	0.999547	1919	0.001	0.0452965	85	0.955714	18084699
	0.0001	0.000458294	86	0.999542	3836	0.001	0.0458294	86	0.955205	34549187
	0.0001	0.000463623	87	0.999536	7668	0.001	0.0463623	87	0.954696	65967944
	0.0001	0.000468952	88	0.999531	15329	0.001	0.0468952	88	0.954187	125891565		Cullture Diluted
	0.0001	0.000474281	89	0.999526	12.1749	0.001	0.0474281	89	0.953679	99987.8
	0.0001	0.00047961	90	0.999521	24	0.001	0.047961	90	0.953171	190611
	0.0001	0.000484939	91	0.999515	48	0.001	0.0484939	91	0.952663	363176
	0.0001	0.000490268	92	0.99951	96	0.001	0.0490268	92	0.952156	691600
	0.0001	0.000495597	93	0.999505	192	0.001	0.0495597	93	0.951648	1316320
	0.0001	0.000500926	94	0.999499	384	0.001	0.0500926	94	0.951141	2504013
	0.0001	0.000506255	95	0.999494	768	0.001	0.0506255	95	0.950635	4760803
	0.0001	0.000511584	96	0.999489	1535	0.001	0.0511584	96	0.950128	9046746
	0.0001	0.000516913	97	0.999483	3068	0.001	0.0516913	97	0.949622	17181978
	0.0001	0.000522242	98	0.999478	6133	0.001	0.0522242	98	0.949116	32615383
	0.0001	0.000527571	99	0.999473	12260	0.001	0.0527571	99	0.94861	61878585
	0.0001	0.0005329	100	0.999467	24507	0.001	0.05329	100	0.948105	117334799		Cullture Diluted
	0.0001	0.000538229	101	0.999462	20.882	0.001	0.0538229	101	0.9476	99979.1
	0.0001	0.000543558	102	0.999457	42	0.001	0.0543558	102	0.947095	189379
	0.0001	0.000548887	103	0.999451	84	0.001	0.0548887	103	0.946591	358529
	0.0001	0.000554216	104	0.999446	168	0.001	0.0554216	104	0.946086	678399
	0.0001	0.000559545	105	0.999441	336	0.001	0.0559545	105	0.945582	1282964
	0.0001	0.000564874	106	0.999435	672	0.001	0.0564874	106	0.945078	2425003
	0.0001	0.000570203	107	0.99943	1343	0.001	0.0570203	107	0.944575	4581194
	0.0001	0.000575532	108	0.999425	2684	0.001	0.0575532	108	0.944072	8649951
	0.0001	0.000580861	109	0.999419	5365	0.001	0.0580861	109	0.943569	16323647
	0.0001	0.00058619	110	0.999414	10724	0.001	0.058619	110	0.943066	30788554
	0.0001	0.000591519	111	0.999409	21435	0.001	0.0591519	111	0.942564	58040342
	0.0001	0.000596848	112	0.999403	42844	0.001	0.0596848	112	0.942061	109355139		Cullture Diluted
	0.0001	0.000602177	113	0.999398	39.1634	0.001	0.0602177	113	0.94156	99960.8
	0.0001	0.000607506	114	0.999393	78	0.001	0.0607506	114	0.941058	188138
	0.0001	0.000612835	115	0.999387	156	0.001	0.0612835	115	0.940557	353909
	0.0001	0.000618164	116	0.999382	312	0.001	0.0618164	116	0.940056	665388
	0.0001	0.000623493	117	0.999377	624	0.001	0.0623493	117	0.939555	1250337
	0.0001	0.000628822	118	0.999371	1247	0.001	0.0628822	118	0.939054	2348268
	0.0001	0.000634151	119	0.999366	2492	0.001	0.0634151	119	0.938554	4407952
	0.0001	0.00063948	120	0.999361	4981	0.001	0.063948	120	0.938054	8269792
	0.0001	0.000644809	121	0.999355	9956	0.001	0.0644809	121	0.937554	15506754
	0.0001	0.000650138	122	0.99935	19899	0.001	0.0650138	122	0.937055	29061349
	0.0001	0.000655467	123	0.999345	39772	0.001	0.0655467	123	0.936555	54435124
	0.0001	0.000660796	124	0.999339	79491	0.001	0.0660796	124	0.936056	101908692		Cullture Diluted
	0.0001	0.000666125	125	0.999334	77.9414	0.001	0.0666125	125	0.935558	99922.1
	0.0001	0.000671454	126	0.999329	156	0.001	0.0671454	126	0.935059	186866
	0.0001	0.000676783	127	0.999323	312	0.001	0.0676783	127	0.934561	349275
	0.0001	0.000682112	128	0.999318	624	0.001	0.0682112	128	0.934063	652490
	0.0001	0.000687441	129	0.999313	1247	0.001	0.0687441	129	0.933566	1218284
	0.0001	0.00069277	130	0.999307	2492	0.001	0.069277	130	0.933068	2273484
	0.0001	0.000698099	131	0.999302	4981	0.001	0.0698099	131	0.932571	4240371
	0.0001	0.000703428	132	0.999297	9955	0.001	0.0703428	132	0.932074	7904682
	0.0001	0.000708757	133	0.999291	19896	0.001	0.0708757	133	0.931578	14727651
	0.0001	0.000714086	134	0.999286	39764	0.001	0.0714086	134	0.931081	27425284
	0.0001	0.000719415	135	0.999281	79471	0.001	0.0719415	135	0.930585	51043137
	0.0001	0.000724744	136	0.999276	158827	0.001	0.0724744	136	0.93009	94949382		Cullture Diluted
	0.0001	0.000730073	137	0.99927	166.996	0.001	0.0730073	137	0.929594	99833
	0.0001	0.000735402	138	0.999265	334	0.001	0.0735402	138	0.929099	185509
	0.0001	0.000740731	139	0.99926	668	0.001	0.0740731	139	0.928604	344529
	0.0001	0.00074606	140	0.999254	1335	0.001	0.074606	140	0.928109	639521
	0.0001	0.000751389	141	0.999249	2668	0.001	0.0751389	141	0.927615	1186458
	0.0001	0.000756718	142	0.999244	5332	0.001	0.0756718	142	0.92712	2199979
	0.0001	0.000762047	143	0.999238	10656	0.001	0.0762047	143	0.926627	4077118
	0.0001	0.000767376	144	0.999233	21296	0.001	0.0767376	144	0.926133	7551906
	0.0001	0.000772705	145	0.999228	42559	0.001	0.0772705	145	0.925639	13980685
	0.0001	0.000778034	146	0.999222	85052	0.001	0.0778034	146	0.925146	25868359
	0.0001	0.000783363	147	0.999217	169971	0.001	0.0783363	147	0.924653	47838535
	0.0001	0.000788692	148	0.999212	339674	0.001	0.0788692	148	0.924161	88421002		Cullture Diluted
	0.0001	0.000794021	149	0.999206	382.685	0.001	0.0794021	149	0.923668	99617.3
	0.0001	0.00079935	150	0.999201	765	0.001	0.079935	150	0.923176	183929
	0.0001	0.000804679	151	0.999196	1529	0.001	0.0804679	151	0.922685	339417
	0.0001	0.000810008	152	0.99919	3056	0.001	0.0810008	152	0.922193	626016
	0.0001	0.000815337	153	0.999185	6107	0.001	0.0815337	153	0.921702	1154000
	0.0001	0.000820666	154	0.99918	12204	0.001	0.0820666	154	0.921211	2126154
	0.0001	0.000825995	155	0.999174	24388	0.001	0.0825995	155	0.92072	3915184
	0.0001	0.000831324	156	0.999169	48735	0.001	0.0831324	156	0.920229	7205734
	0.0001	0.000836653	157	0.999164	97388	0.001	0.0836653	157	0.919739	13254791
	0.0001	0.000841982	158	0.999158	194612	0.001	0.0841982	158	0.919249	24368909
	0.0001	0.000847311	159	0.999153	388894	0.001	0.0847311	159	0.918759	44778326
	0.0001	0.00085264	160	0.999148	777125	0.001	0.085264	160	0.91827	82237176		Cullture Diluted
	0.0001	0.000857969	161	0.999142	936.134	0.001	0.0857969	161	0.917781	99063.9
	0.0001	0.000863298	162	0.999137	1871	0.001	0.0863298	162	0.917292	181741
	0.0001	0.000868627	163	0.999132	3739	0.001	0.0868627	163	0.916803	333241
	0.0001	0.000873956	164	0.999126	7471	0.001	0.0873956	164	0.916315	610707
	0.0001	0.000879285	165	0.999121	14929	0.001	0.0879285	165	0.915826	1118603
	0.0001	0.000884614	166	0.999116	29832	0.001	0.0884614	166	0.915338	2047801
	0.0001	0.000889943	167	0.99911	59611	0.001	0.0889943	167	0.914851	3746865
	0.0001	0.000895272	168	0.999105	119115	0.001	0.0895272	168	0.914363	6851993
	0.0001	0.000900601	169	0.9991	238016	0.001	0.0900601	169	0.913876	12523748
	0.0001	0.00090593	170	0.999094	475601	0.001	0.090593	170	0.913389	22878118
	0.0001	0.000911259	171	0.999089	950336	0.001	0.0911259	171	0.912903	41770997
	0.0001	0.000916588	172	0.999084	1898931	0.001	0.0916588	172	0.912416	76225091		Cullture Diluted
	0.0001	0.000921917	173	0.999079	2430.66	0.001	0.0921917	173	0.91193	97569.3
	0.0001	0.000927246	174	0.999073	4857	0.001	0.0927246	174	0.911445	177858
	0.0001	0.000932575	175	0.999068	9705	0.001	0.0932575	175	0.910959	324043
	0.0001	0.000937904	176	0.999063	19392	0.001	0.0937904	176	0.910474	590065
	0.0001	0.000943233	177	0.999057	38747	0.001	0.0943233	177	0.909989	1073905
	0.0001	0.000948562	178	0.999052	77421	0.001	0.0948562	178	0.909504	1953441
	0.0001	0.000953891	179	0.999047	154694	0.001	0.0953891	179	0.909019	3551431
	0.0001	0.00095922	180	0.999041	309091	0.001	0.095922	180	0.908535	6453198
	0.0001	0.000964549	181	0.999036	617586	0.001	0.0964549	181	0.908051	11719665
	0.0001	0.000969878	182	0.999031	1233975	0.001	0.0969878	182	0.907567	21272766
	0.0001	0.000975207	183	0.999025	2465544	0.001	0.0975207	183	0.907084	38592355
	0.0001	0.000980536	184	0.99902	4926255	0.001	0.0980536	184	0.9066	69975687		Cullture Diluted
	0.0001	0.000985865	185	0.999015	6576.94	0.001	0.0985865	185	0.906117	93423.1
	0.0001	0.000991194	186	0.999009	13141	0.001	0.0991194	186	0.905635	169214
	0.0001	0.000996523	187	0.999004	26256	0.001	0.0996523	187	0.905152	306329
	0.0001	0.00100185	188	0.998999	52459	0.001	0.100185	188	0.90467	554253
	0.0001	0.00100718	189	0.998993	104812	0.001	0.100718	189	0.904188	1002298
	0.0001	0.00101251	190	0.998988	209412	0.001	0.101251	190	0.903706	1811566
	0.0001	0.00101784	191	0.998983	418398	0.001	0.101784	191	0.903225	3272503
	0.0001	0.00102317	192	0.998977	835940	0.001	0.102317	192	0.902744	5908462
	0.0001	0.0010285	193	0.998972	1670161	0.001	0.10285	193	0.902263	10661969
	0.0001	0.00103383	194	0.998967	3336870	0.001	0.103383	194	0.901782	19229542
	0.0001	0.00103915	195	0.998961	6666809	0.001	0.103915	195	0.901302	34663231
	0.0001	0.00104448	196	0.998956	13319699	0.001	0.104448	196	0.900821	62450757		Cullture Diluted
	0.0001	0.00104981	197	0.998951	17579	0.001	0.104981	197	0.900341	82421
	0.0001	0.00105514	198	0.998945	35121	0.001	0.105514	198	0.899862	148335
	0.0001	0.00106047	199	0.99894	70168	0.001	0.106047	199	0.899382	266820
	0.0001	0.0010658	200	0.998935	140187	0.001	0.10658	200	0.898903	479691
	0.0001	0.00107113	201	0.998929	280074	0.001	0.107113	201	0.898424	861932
	0.0001	0.00107646	202	0.998924	559545	0.001	0.107646	202	0.897946	1547936
	0.0001	0.00108179	203	0.998919	1117880	0.001	0.108179	203	0.897467	2778444
	0.0001	0.00108712	204	0.998913	2233331	0.001	0.108712	204	0.896989	4984468
	0.0001	0.00109245	205	0.998908	4461785	0.001	0.109244	205	0.896511	8937263
	0.0001	0.00109777	206	0.998903	8913779	0.001	0.109777	206	0.896034	16016177
	0.0001	0.0011031	207	0.998898	17807903	0.001	0.11031	207	0.895556	28686775
	0.0001	0.00110843	208	0.998892	35576350	0.001	0.110843	208	0.895079	51353869		Cullture Diluted
	0.0001	0.00111376	209	0.998887	40925.2	0.001	0.111376	209	0.894602	59074.8
	0.0001	0.00111909	210	0.998882	81759	0.001	0.111909	210	0.894126	105641
	0.0001	0.00112442	211	0.998876	163334	0.001	0.112442	211	0.893649	188812
	0.0001	0.00112975	212	0.998871	326299	0.001	0.112975	212	0.893173	337284
	0.0001	0.00113508	213	0.998866	651858	0.001	0.113508	213	0.892697	602185
	0.0001	0.00114041	214	0.99886	1302230	0.001	0.114041	214	0.892222	1074565
	0.0001	0.00114573	215	0.998855	2601478	0.001	0.114573	215	0.891746	1916479
	0.0001	0.00115106	216	0.99885	5196971	0.001	0.115106	216	0.891271	3416206
	0.0001	0.00115639	217	0.998844	10381929	0.001	0.115639	217	0.890797	6086289
	0.0001	0.00116172	218	0.998839	20739750	0.001	0.116172	218	0.890322	10837514
	0.0001	0.00116705	219	0.998834	41431120	0.001	0.116705	219	0.889848	19287473
	0.0001	0.00117238	220	0.998828	82765151	0.001	0.117238	220	0.889374	34307537		Cullture Diluted
	0.0001	0.00117771	221	0.998823	70695.5	0.001	0.117771	221	0.8889	29304.5
	0.0001	0.00118304	222	0.998818	141224	0.001	0.118304	222	0.888426	52070
	0.0001	0.00118837	223	0.998812	282113	0.001	0.118837	223	0.887953	92471
	0.0001	0.0011937	224	0.998807	563553	0.001	0.11937	224	0.88748	164132
	0.0001	0.00119903	225	0.998802	1125755	0.001	0.119902	225	0.887007	291172
	0.0001	0.00120435	226	0.998796	2248800	0.001	0.120435	226	0.886534	516268
	0.0001	0.00120968	227	0.998791	4492163	0.001	0.120968	227	0.886062	914891
	0.0001	0.00121501	228	0.998786	8973417	0.001	0.121501	228	0.88559	1620437
	0.0001	0.00122034	229	0.99878	17924946	0.001	0.122034	229	0.885118	2868557
	0.0001	0.00122567	230	0.998775	35805979	0.001	0.122567	230	0.884647	5075319
	0.0001	0.001231	231	0.99877	71523858	0.001	0.1231	231	0.884175	8974944
	0.0001	0.00123633	232	0.998764	142870972	0.001	0.123633	232	0.883704	15862394		Cullture Diluted
	0.0001	0.00124166	233	0.998759	90006.9	0.001	0.124166	233	0.883234	9993.11
	0.0001	0.00124699	234	0.998754	179789	0.001	0.124699	234	0.882763	17643
	0.0001	0.00125231	235	0.998748	359128	0.001	0.125231	235	0.882293	31133
	0.0001	0.00125764	236	0.998743	717353	0.001	0.125764	236	0.881823	54908
	0.0001	0.00126297	237	0.998738	1432895	0.001	0.126297	237	0.881353	96787
	0.0001	0.0012683	238	0.998733	2862158	0.001	0.12683	238	0.880883	170516
	0.0001	0.00127363	239	0.998727	5717030	0.001	0.127363	239	0.880414	300249
	0.0001	0.00127896	240	0.998722	11419446	0.001	0.127896	240	0.879945	528405
	0.0001	0.00128429	241	0.998717	22809579	0.001	0.128429	241	0.879476	929439
	0.0001	0.00128962	242	0.998711	45560365	0.001	0.128962	242	0.879008	1633968
	0.0001	0.00129495	243	0.998706	91002810	0.001	0.129495	243	0.878539	2871010
	0.0001	0.00130028	244	0.998701	181769116	0.001	0.130028	244	0.878071	5044590		Cullture Diluted
	0.0001	0.00130561	245	0.998695	97299.7	0.001	0.13056	245	0.877603	2700.33
	0.0001	0.00131093	246	0.99869	194344	0.001	0.131093	246	0.877136	4737
	0.0001	0.00131626	247	0.998685	388177	0.001	0.131626	247	0.876669	8306
	0.0001	0.00132159	248	0.998679	775329	0.001	0.132159	248	0.876202	14555
	0.0001	0.00132692	249	0.998674	1548602	0.001	0.132692	249	0.875735	25493
	0.0001	0.00133225	250	0.998669	3093081	0.001	0.133225	250	0.875268	44626
	0.0001	0.00133758	251	0.998663	6177893	0.001	0.133758	251	0.874802	78078
	0.0001	0.00134291	252	0.998658	12339204	0.001	0.134291	252	0.874336	136533
	0.0001	0.00134824	253	0.998653	24645158	0.001	0.134824	253	0.87387	238624
	0.0001	0.00135357	254	0.998647	49223643	0.001	0.135357	254	0.873404	416831
	0.0001	0.00135889	255	0.998642	98313597	0.001	0.135889	255	0.872939	727736
	0.0001	0.00136422	256	0.998637	196359134	0.001	0.136422	256	0.872474	1269862		Cullture Diluted
	0.0001	0.00136955	257	0.998631	99357.5	0.001	0.136955	257	0.872009	642.548
	0.0001	0.00137488	258	0.998626	198442	0.001	0.137488	258	0.871545	1120
	0.0001	0.00138021	259	0.998621	396337	0.001	0.138021	259	0.87108	1952
	0.0001	0.00138554	260	0.998615	791576	0.001	0.138554	260	0.870616	3401
	0.0001	0.00139087	261	0.99861	1580952	0.001	0.139087	261	0.870152	5922
	0.0001	0.0013962	262	0.998605	3157492	0.001	0.13962	262	0.869689	10306
	0.0001	0.00140153	263	0.998599	6306140	0.001	0.140153	263	0.869226	17926
	0.0001	0.00140686	264	0.998594	12594549	0.001	0.140686	264	0.868762	31163
	0.0001	0.00141219	265	0.998589	25153551	0.001	0.141218	265	0.8683	54146
	0.0001	0.00141751	266	0.998583	50235842	0.001	0.141751	266	0.867837	94030
	0.0001	0.00142284	267	0.998578	100328830	0.001	0.142284	267	0.867375	163205
	0.0001	0.00142817	268	0.998573	200371291	0.001	0.142817	268	0.866913	283120		Cullture Diluted
	0.0001	0.0014335	269	0.998568	99858.9	0.001	0.14335	269	0.866451	141.098
	0.0001	0.00143883	270	0.998562	199431	0.001	0.143883	270	0.865989	244
	0.0001	0.00144416	271	0.998557	398286	0.001	0.144416	271	0.865528	422
	0.0001	0.00144949	272	0.998552	795418	0.001	0.144949	272	0.865067	730
	0.0001	0.00145482	273	0.998546	1588523	0.001	0.145482	273	0.864606	1262
	0.0001	0.00146015	274	0.998541	3172410	0.001	0.146015	274	0.864145	2181
	0.0001	0.00146547	275	0.998536	6335529	0.001	0.146547	275	0.863685	3767
	0.0001	0.0014708	276	0.99853	12652435	0.001	0.14708	276	0.863225	6504
	0.0001	0.00147613	277	0.998525	25267544	0.001	0.147613	277	0.862765	11223
	0.0001	0.00148146	278	0.99852	50460278	0.001	0.148146	278	0.862305	19355
	0.0001	0.00148679	279	0.998514	100770620	0.001	0.148679	279	0.861846	33362
	0.0001	0.00149212	280	0.998509	201240741	0.001	0.149212	280	0.861387	57475		Cullture Diluted
	0.0001	0.00149745	281	0.998504	99971.4	0.001	0.149745	281	0.860928	28.5522
	0.0001	0.00150278	282	0.998498	199643	0.001	0.150278	282	0.860469	49
	0.0001	0.00150811	283	0.998493	398684	0.001	0.150811	283	0.860011	84
	0.0001	0.00151344	284	0.998488	796162	0.001	0.151344	284	0.859552	144
	0.0001	0.00151877	285	0.998482	1589907	0.001	0.151876	285	0.859094	247
	0.0001	0.00152409	286	0.998477	3174971	0.001	0.152409	286	0.858637	424
	0.0001	0.00152942	287	0.998472	6340238	0.001	0.152942	287	0.858179	728
	0.0001	0.00153475	288	0.998466	12661030	0.001	0.153475	288	0.857722	1249
	0.0001	0.00154008	289	0.998461	25283092	0.001	0.154008	289	0.857265	2141
	0.0001	0.00154541	290	0.998456	50488099	0.001	0.154541	290	0.856808	3669
	0.0001	0.00155074	291	0.99845	100819732	0.001	0.155074	291	0.856352	6284
	0.0001	0.00155607	292	0.998445	201325943	0.001	0.155607	292	0.855896	10757		Cullture Diluted
	0.0001	0.0015614	293	0.99844	99994.7	0.001	0.15614	293	0.85544	5.34279
	0.0001	0.00156673	294	0.998435	199676	0.001	0.156673	294	0.854984	9
	0.0001	0.00157205	295	0.998429	398725	0.001	0.157205	295	0.854529	15
	0.0001	0.00157738	296	0.998424	796193	0.001	0.157738	296	0.854073	26
	0.0001	0.00158271	297	0.998419	1589868	0.001	0.158271	297	0.853618	44
	0.0001	0.00158804	298	0.998413	3174690	0.001	0.158804	298	0.853163	75
	0.0001	0.00159337	299	0.998408	6339271	0.001	0.159337	299	0.852709	128
	0.0001	0.0015987	300	0.998403	12658289	0.001	0.15987	300	0.852255	218
	0.0001	0.00160403	301	0.998397	25276002	0.001	0.160403	301	0.851801	371
	0.0001	0.00160936	302	0.998392	50470713	0.001	0.160936	302	0.851347	632
	0.0001	0.00161469	303	0.998387	100778569	0.001	0.161469	303	0.850893	1076
	0.0001	0.00162002	304	0.998381	201230877	0.001	0.162002	304	0.85044	1830		Cullture Diluted

## Sheet: 9
Ploidy measurements of diploid pol3-01/pol3-01 msh6Δ/msh6Δ evolved cultures for Fig. 3B.
T1	1	2	3	4	5	6	7	8	9	10	11	12
A	A1	A2	A3	A4	A5	A6	A7	A8	A9	A10	A11	A12
B	B1	B2	B3	B4	B5	B6	empty	B8	B9	B10	B11	B12
C	C1	C2	empty	C4	C5	C6	C7	C8	C9	empty	C11	C12
D	D1	D2	D3	D4	D5	D6	D7	D8	D9	D10	empty (2n control)	D12
E	E1	E2	E3	E4	E5	empty	E7	E8	E9	E10	E11	E12
F	F1	F2	F3	F4	F5	F6	F7	F8	F9	F10	F11	F12
G	G1	G2	G3	G4	G5	G6	G7	G8	empty	G10	G11	G12
H	H1	H2	H3	H4	H5	H6	H7	H8	H9	H10	H11	empty
T10	1	2	3	4	5	6	7	8	9	10	11	12
A	A1	A2	A3	A4	A5	A6	A7	A8	A9	A10	A11	A12
B	B1	B2	B3	B4	B5	B6	empty	B8	B9	B10	B11	B12
C	C1	C2	empty	C4	C5	C6	C7	C8	C9	empty	C11	C12
D	D1	D2	D3	D4	D5	D6	D7	D8	D9	D10	empty (2n control)	D12
E	E1	E2	E3	E4	E5	empty	E7	E8	E9	E10	E11	E12
F	F1	F2	F3	F4	F5	F6	F7	F8	F9	F10	F11	F12
G	G1	G2	G3	G4	G5	G6	G7	G8	empty	G10	G11	G12
H	H1	H2	H3	H4	H5	H6	H7	H8	H9	H10	H11	empty (4n Control)
	(All histograms are ploted with a 4n control grown in H12)
T19	1	2	3	4	5	6	7	8	9	10	11	12
A	A1	A2	A3	A4	A5	A6	A7	A8	A9	A10	A11	A12
B	B1	B2	B3	B4	B5	B6	empty	B8	B9	B10	B11	B12
C	C1	C2	empty	C4	C5	C6	C7	C8	C9	empty	C11	C12
D	D1	D2	D3	D4	D5	D6	D7	D8	D9	D10	empty (2n control)	D12
E	E1	E2	E3	E4	E5	empty	E7	E8	E9	E10	E11	E12
F	F1	F2	F3	F4	F5	F6	F7	F8	F9	F10	F11	F12
G	G1	G2	G3	G4	G5	G6	G7	G8	empty	G10	G11	G12
H	H1	H2	H3	H4	H5	H6	H7	H8	H9	H10	H11	4n Control
	(All histograms are ploted with a 4n control grown in H12)
T27	1	2	3	4	5	6	7	8	9	10	11	12
A	A1	A2	A3	A4	A5	A6	A7	A8	A9	A10	A11	A12
B	B1	B2	B3	B4	B5	B6	empty	B8	B9	B10	B11	B12
C	C1	C2	empty	C4	C5	C6	C7	C8	C9	empty	C11	C12
D	D1	D2	D3	D4	D5	D6	D7	D8	D9	D10	empty (2n control)	D12
E	E1	E2	E3	E4	E5	empty	E7	E8	E9	E10	E11	E12
F	F1	F2	F3	F4	F5	F6	F7	F8	F9	F10	F11	F12
G	G1	G2	G3	G4	G5	G6	G7	G8	empty	G10	G11	G12
H	H1	H2	H3	H4	H5	H6	H7	H8	H9	H10	H11	empty (4n control)

[truncated: 5 more sheets: 10, 11, 12, 13, 14]
